# Supplementary material
Source: Springer Nature journal article supplement (https://www.springermedizin.de/resource/supplementary/12879_2009_1066_MOESM1_ESM.pdf/9442504)
Supplement: MOESM1 [file 9442504]

263K-infected  
hamsters

kDa

di-glycosylated PrP<sup>Sc</sup> →

mono-glycosylated PrP<sup>Sc</sup> →

non-glycosylated PrP<sup>Sc</sup> →

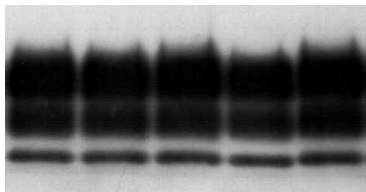

— 31

— 20

139A-infected  
hamsters

di-glycosylated PrP<sup>Sc</sup> →

mono-glycosylated PrP<sup>Sc</sup> →

non-glycosylated PrP<sup>Sc</sup> →

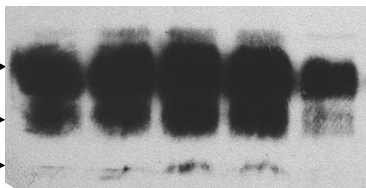

— 31

— 20
